# Supplementary material
Source: Springer Nature journal article supplement (https://www.springermedizin.de/resource/supplementary/12984_2011_368_MOESM1_ESM.pdf/9605862)

(a) A-P Accelerometry, Segmented Swallow

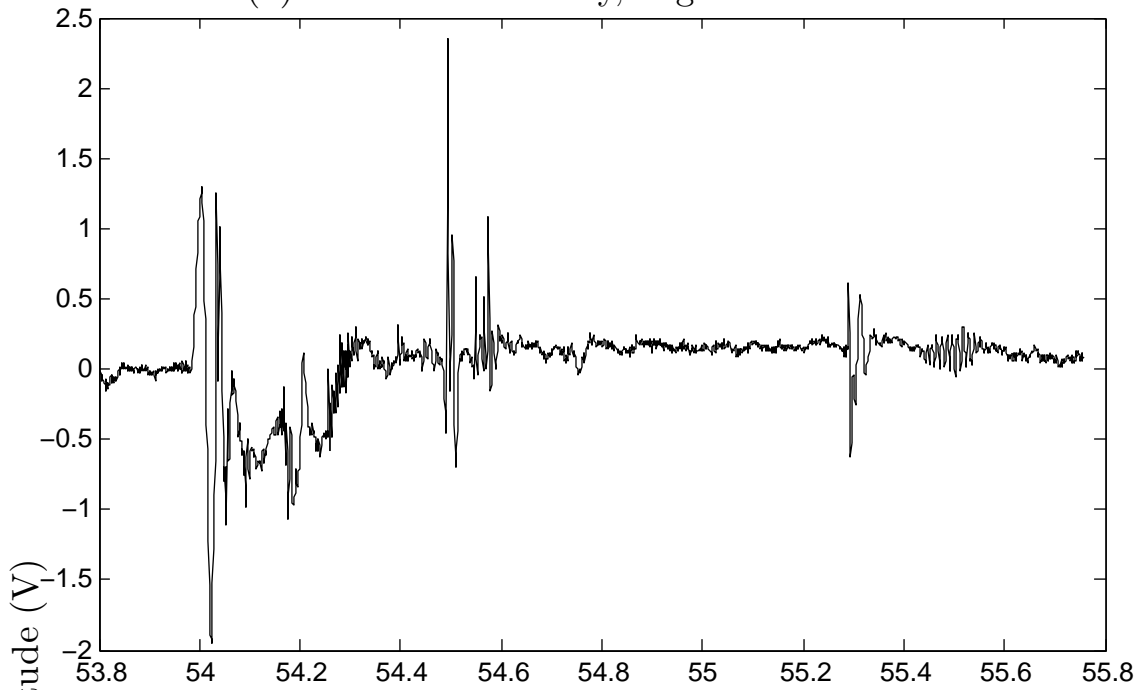

(b) S-I Accelerometry, Segmented Swallow

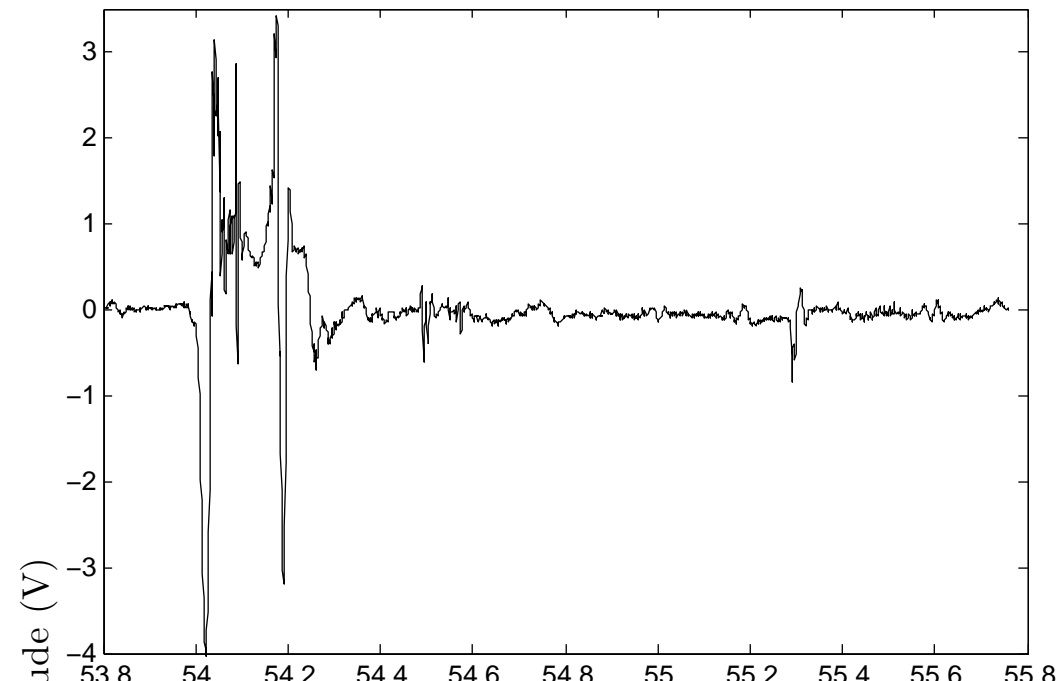

(c) A-P Accelerometry, Trimmed Swallow

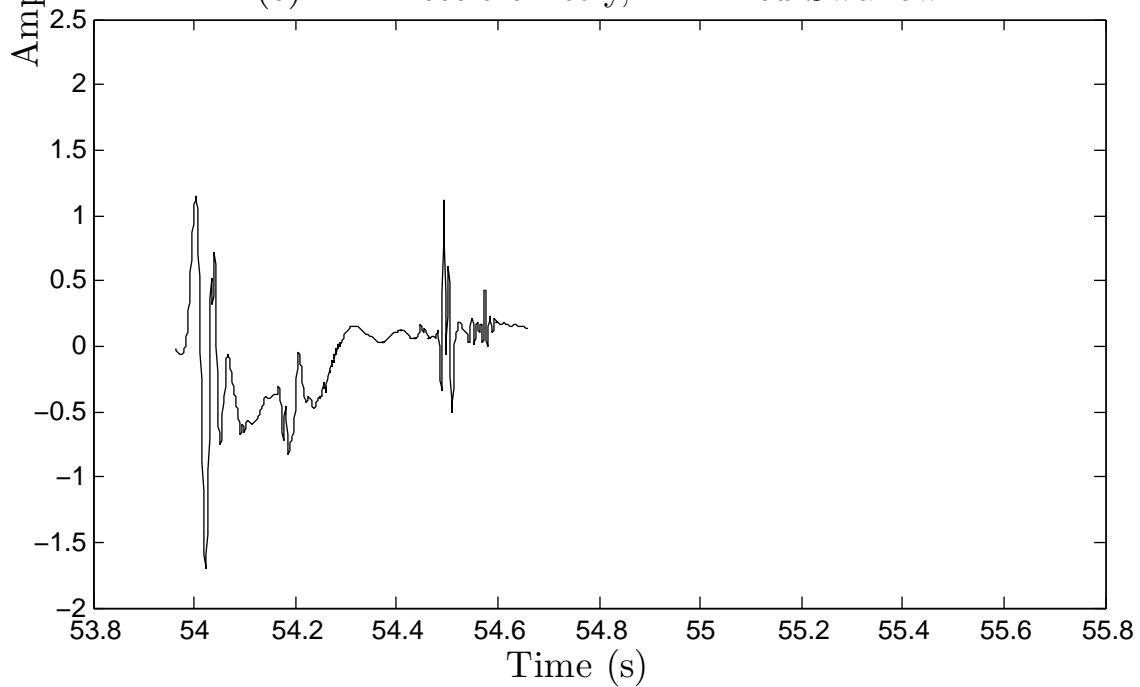

(d) S-I Accelerometry, Trimmed Swallow

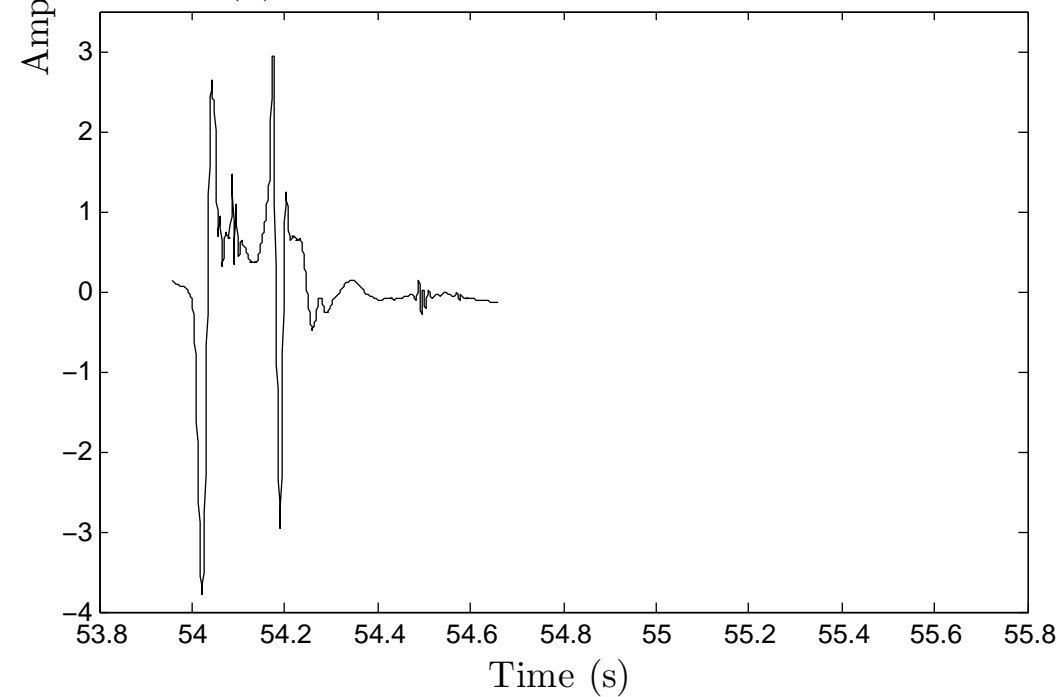

Supplement: MOESM1 [file 9605862]
